# Supplementary material for: Effects of immunization against PCSK9 in an experimental model of breast cancer
Source: PubMed Central journal article supplement — Arch Med Sci. 2019 Apr 30;15(3):570–9. doi: 10.5114/aoms.2019.84734 (PMC6524183; doi:10.5114/aoms.2019.84734), 2019-04-30
Supplement: AMS-15-36484-S1.pdf [file AMS-15-36484-S1.pdf]

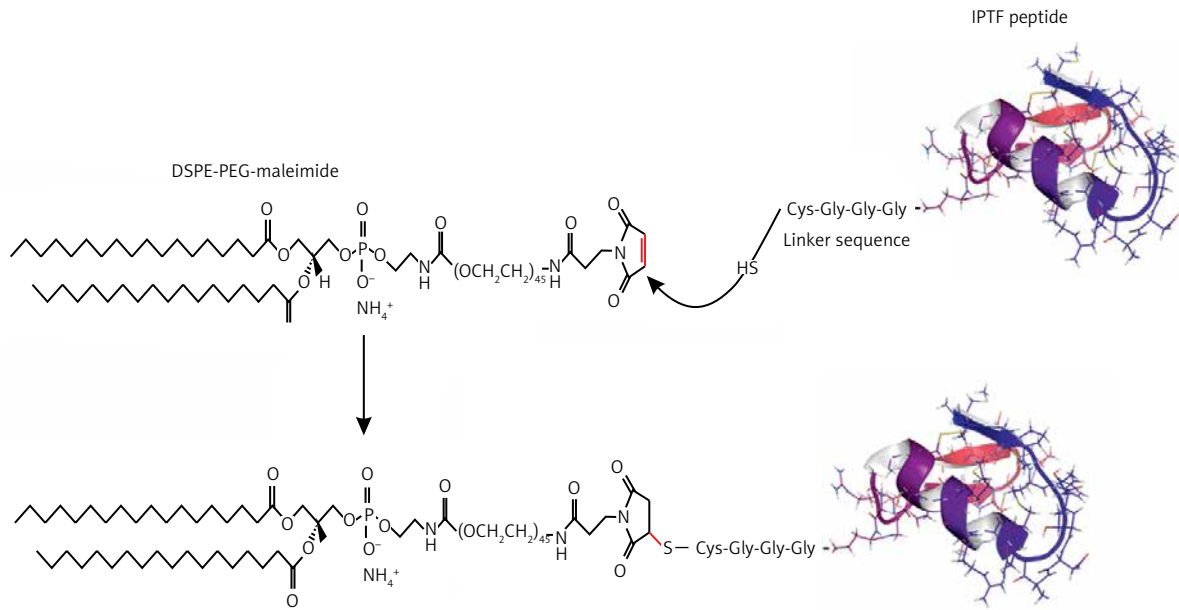

**Supplementary Figure S1.** Schematic view of linking between peptide and DSPE-PEG-maleimide

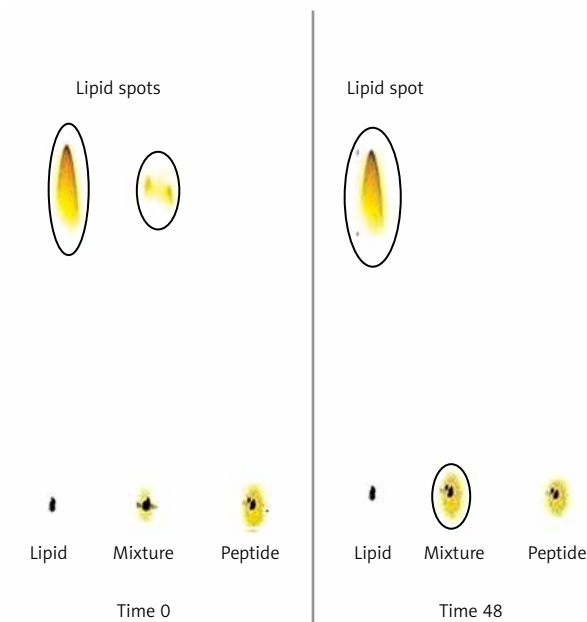

**Supplementary Figure S2.** Assessment of conjugation between DSPE-PEG-Mal and the IFPT peptide at time zero and 48 h after start of reaction. Lipid (DSPE-PEG-Mal) is dissolved in the mobile phase and ascends to the top of the TLC plate (spots at the top of the left and middle lines) but peptide is bound to the silica and remains in the spotting point (the middle line). After 48 h, lipid bound to peptide and stayed at the point of spotting and therefore the lipid spot on the top of the reaction mixture line disappeared, indicating the conjugation of the IFPT peptide and DSPE-PEG-Mal linker

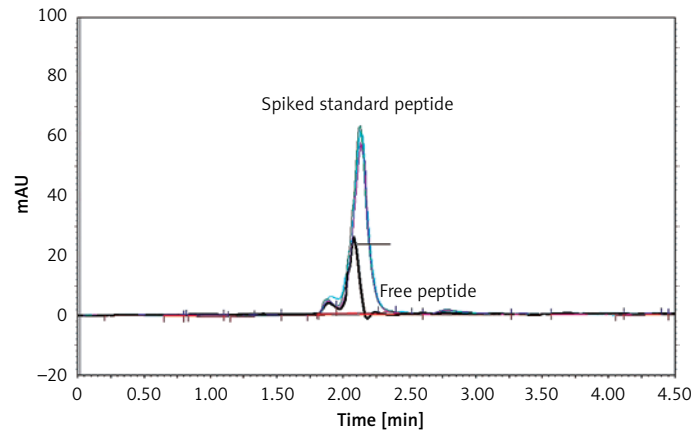

**Supplementary Figure S3.** HPLC chromatogram of DSPE-PEG-IFPT micelles and reference standard IFPT peptide. The retention time of the reference standard was observed at 2.2 min and it was found to be the same with free peptide present in the micelle sample
